1 Original article  
2 TITLE: THE DISTRIBUTION OF KERATOMETRY  
3 READINGS, CORNEAL POWER AND CORNEAL  
4 ASTIGMATISM AMONG MALAWIAN YOUNG ADULTS.  
5 RUNNING TITLE: KERATOMETRY READINGS AND  
6 CORNEAL ASTIGMATISM AMONG MALAWIANS  
7 Kenneth Gondwe<sup>1</sup>, Thokozani Mzumara<sup>1,2</sup>, & Joseph Afonne<sup>1</sup>,

8 Affiliations

9 1. Mzuzu university

10 Private bag 201

11 Mzuzu, Malawi

12 2. Mzimba North District Hospital

13 P. O Box 219

14 Mzuzu, Malawi

15 Corresponding author\* Joseph Afonne

16 Mzuzu University

17 Private bag 201

18 Mzuzu, Malawi

19 [drchinkatan@gmail.com](mailto:drchinkatan@gmail.com)

20

21

22

23

24 ABSTRACT

25 Background/objectives: keratometry and corneal measurements  
26 differ among populations. The aim of the study was to assess the  
27 distribution of keratometric values and corneal astigmatism and  
28 examine the association with age and gender among normal  
29 Malawian adults.

30 Methods: This was a cross-sectional study conducted among  
31 Mzuzu university students in Malawi. Participants were selected  
32 using systematic sampling techniques. K readings were measured  
33 using a manual keratometer. Data was entered in SPSS v 26. Chi-  
34 square was used to assess association, spearman to assess  
35 correction, and an independent t-test to compare the mean.

36 Results: We recruited 98 participants, of whom 59 (60.2%) were  
37 male and 39 (39.8%) were female. The Mean age of participants  
38 was 27.13 years (SD=5.616). Based on gender, it was 27.97  
39 (SD=5.860) among males and 25.87 (SD=5.038) among females.  
40 But an independent t-test showed no significant difference in age  
41 according to gender( $t(96)= 1.8, p=0.71$ ). On average, the flat and  
42 steep K reading was 44.93D (SD=1.49) and 45.40D (SD=1.53)  
43 respectively. The mean K was 45.17D (SD=1.47). With regards to  
44 gender, the mean K was 45.17D (SD=1.38) and 45.18D (SD=1.62)  
45 among males and females respectively, but it was not statistically  
46 significant. ( $t(96)=-0.045, p=0.96$ ). Spearman test showed that the  
47 correlation between mean K and age was statistically non-  
48 significant mean

49 Conclusion: Corneal astigmatism is relatively tiny among this  
50 population group hence surgeons can use techniques to correct and  
51 other techniques to achieve greater visual rehabilitation. This  
52 study confirms that Environment and genetics play a major role in  
53 corneal changes.

54 Keywords: Corneal Astigmatism, keratometer, Toric Intra Ocular  
55 Lens, Cataract Surgery, ocular surface

56

57

58 INTRODUCTION

59 Uncorrected refractive error is the leading cause of visual  
60 impairment worldwide. [1] The two major components of  
61 refractive error include spherical and astigmatism. [2] Astigmatism  
62 can further be classified into lenticular and Corneal Astigmatism  
63 (CA).[1] CA is defined as the difference in radius of curvature  
64 between two principal meridians., the steep (stronger meridian)  
65 and the flat (weaker meridian) meridian. Besides, increased CA is  
66 a risk factor for other conditions such as amblyopia and  
67 strabismus. Generally, CA is larger among white-skinned people.  
68 [1]

69 Astigmatism greatly contributes to the visual acuity of pseudo-  
70 aphakic patients. [3] Accordingly, CA greater than 1 D could  
71 prevent optimal vision. [4] Fortunately, toric implantation can  
72 correct about 0.8 D of CA.[5] Hence, analysis of corneal  
73 Astigmatism is relevant for IOL manufacturers. Since the advent  
74 of modern cataract surgery techniques enables the correction of  
75 astigmatism. [6,7] Knowledge regarding the distribution of CA is  
76 crucial for the reduction of post-operative astigmatism during  
77 cataract surgery by selecting appropriate methods such as limbal  
78 relaxing incisions, opposite clear corneal incisions, and excimer  
79 laser refractive procedures. [5] In theatre, different degrees of CA,

80 including magnitude and axis, call for varying approaches to  
81 surgical corrections. [6]

82 Globally, Different populations have varying corneal parameter  
83 values. Accordingly, different factors such as genetics, age,  
84 gender, and environment have a huge effect on corneal anatomy.  
85 [2] For instance, keratometric values are similar among Caucasians  
86 and slightly lower in the Far eastern populace. [8] Moreover,  
87 values vary according to measuring techniques since various  
88 instruments range from manual to automatic devices. [1,8]  
89 Nevertheless, to the best of our knowledge there is a paucity of  
90 information for the Malawian populace. Hence, this study aims at  
91 assessing the distribution of keratometric readings and corneal  
92 astigmatism and examine the association with age and gender  
93 among normal Malawian adults. The study employed affordable  
94 equipment and hence can be useful for optometry and  
95 ophthalmology practitioners in the region as a reference.

96

97

98

99

100

101

## 102 METHODS

103 We conducted a cross-sectional quantitative study among students  
104 aged between 18 and 50 years. Based on a sample size  
105 determination proposed by Yamane, [9] we recruited 98  
106 participants. The study employed stratified systemic sampling  
107 where the population was stratified according to faculty. Then,  
108 within each faculty participants were recruited considering the nth  
109 term. As an exclusion criterion, we included all non-contact lens  
110 wearers and excluded participants with a history of ocular surgery  
111 and trauma, corneal scar and keratoconus eyes inflammatory eye  
112 disease, and other corneal disorders.

### 113 Procedures

114 We used a Bausch and Lomb keratometer to measure the anterior  
115 vertical and horizontal corneal curvature. [10] First, the patient was  
116 sat in a standard optometric examination room at room  
117 temperature. Prior to collecting demographic information on age  
118 and sex, we explained the procedure to the participants. We  
119 disinfected the keratometer chin and headrest in between patients.  
120 We measured both the right and left eyes. The right eye was  
121 measured first, then the left eye. The keratometric parameters  
122 included the flat (K1) and steep (K2) and recorded the results in

123 Diopters (D). Each variable was measured 5 times and the average  
124 was considered the final value which was recorded on a preform.  
125 Corneal astigmatism, mean K and axis of astigmatism  
126 We defined CA as the 3 mm steep meridian power minus the 3 mm  
127 flat meridian. The axis of the astigmatism was derived from the  
128 steep meridian. The CA was considered With the Rule (WTR)  
129 when the axis was between 60 and 119 while Against the Rule  
130 (ATR) when the axis was between 0 to 29 or 150 to 180 otherwise  
131 it was considered oblique. (1) Mean K was computed as the  
132 average of the two meridians. Astigmatism was considered a  
133 cylinder power of more than 0.5 D. (2)

#### 134 Analysis

135 We entered the data in SPSS version 26. We employed descriptive  
136 statistics to describe frequencies and we graphically illustrated the  
137 data using graphs, boxplots, and tables. In addition, we execute an  
138 independent t-test to compare the mean values of two variables.  
139 Whereas, we utilized one-way ANOVA to compare the mean of  
140 variables more than two. Furthermore, we applied the Spearman  
141 rank test to explore correlations. Accordingly, we considered the  
142 value of  $p < 0.05$  statistically significant.

#### 143 Ethics



144 The study adhered to the declaration of Helsinki. In particular, we  
145 obtained ethical approval from the faculty of health sciences  
146 research committee. Moreover, we obtained informed consent  
147 from each participant and maintained the anonymity of subjects  
148 throughout the process. And participant was injured during the  
149 study.

150

151

## 152 RESULTS

153 To select the appropriate statistical tools for analysis, a Shapiro-  
154 Wilk test was conducted to determine the distribution of the flat  
155 and steep K. The test showed K901 ( $W = 0.989$ ,  $p < 0.571$ ) and  
156 K1802 ( $W = 0.984$ ,  $p < 0.268$ ) were normally distributed.

### 157 Demographic and clinical features of study participants

158 We recruited 98 participants, out of which 59 (60.2%) were male  
159 and 39 (39.8%) were female representing a 1.5 to 1 male-to-female  
160 ratio. The Mean age of participants was 27.13 years ( $SD=5.616$ ).  
161 Based on gender, it was 27.97 ( $SD=5.860$ ) among males and 25.87  
162 ( $SD=5.038$ ) among females, but the independent t-test showed no  
163 significant differences in age according to gender( $t(96)= 1.8$ ,  
164  $p=0.71$ ). The K readings in the left and right eye were strongly  
165 correlated, hence we considered the results of the right eye only.

166 On average, flat and steep K reading was 44.93D (SD=1.49) and  
167 45.40D (SD=1.53) respectively. The mean K was 45.17D  
168 (SD=1.47). With regards to gender, the mean K was 45.17D  
169 (SD=1.38) and 45.18D (SD=1.62) among males and females  
170 respectively, but it was not statistically significant. ( $t(96)=-0.045$ ,  
171  $p=0.96$ ). Spearman test showed that the correlation between mean  
172 K and age was statistically non-significant ( $p=0.245$ ). Figure 1  
173 CA was present in 89 eyes (90.8%). On average the magnitude of  
174 CA was 0.7D (SD=0.53). According to gender, the mean CA was  
175 0.6 D (SD=0.51) among males and 0.8 D (SD=0.54) among  
176 females. An independent t-test showed that CA was higher among  
177 females and the difference was statistically significant ( $t(96)=-$   
178  $0.24$ ,  $p=0.02$ ). About 67 eyes (69.8%) had corneal astigmatism of  
179 less than 1 D. (Figure 2). According to age Highest CA (0.76, SD=  
180 0.55) was recorded among the age group 25-29 while the lowest  
181 (0.57, SD=0.53) was registered by the 40-44 age group. (Figure 3).  
182 Nevertheless, A one-way ANOVA test showed that age group has  
183 no impact on CA.  $F(5,92)=0.34$ ,  $P=0.812$ .  
184 Regarding the type of CA, WTR astigmatism was found in 72  
185 (73.5%) participants, and ATR in 17 (17.3%). Out of the 72 eyes  
186 with WTR, 45 (62.5%) were males compared to 27 (37.5%)  
187 females. While out of the 17 eyes with ATR, 8 (47.1%) Were  
188 males and 9 (52.9%). A chi-square test examined the relationship

189 between gender and type of CA and found that the association was  
190 not statistically significant,  $\chi^2(1, N = 98) = 1.4, p = 0.243$ .  
191 (Figure 4)

## 192 DISCUSSION

193 Understanding the distribution of corneal values is critical not only  
194 for the management of refractive errors but also decision-making  
195 in the clinical diagnosis of pathologies such as keratoconus. [11]

196 In the present study, the mean K was similar to a study in Central  
197 China,[5] however Iran[12] found a lower mean K (43.48D), The  
198 high mean k in our study could be attributed to higher incidences  
199 of myopia in the populace. A recent study [11] found a strong  
200 association between myopia and corneal power. Likewise, Thom  
201 and colleagues, [13] found that myopia unlike hyperopia is the  
202 main cause of reduced vision in Malawi.

203 With regards to gender, our study found no significant difference  
204 between K reading among males and females similar to previous  
205 reports. [8,14] Nevertheless, Hashemi [11] found that males have  
206 flatter corneas than females. Worldwide there is a general  
207 consensus about the gender differences in K readings. The inter-  
208 gender difference is explained by anatomical variations in the  
209 structure of eyelids and physiological functions mainly due to  
210 hormones. [15] The results of our study can be attributed to the

211 ethnicity and genetics of the population group as well as  
212 environmental and lifestyle factors [5] Our study included  
213 participants of African descent while others included participants  
214 of Asian descent. In agreement with previous reports, [16,17] Age  
215 had no correlation with K reading in our study. Nevertheless,  
216 others [11] found that mean K increases linearly up to the seventh  
217 decade of life. The results of our study could be attributed to the  
218 narrow age range. Overall, there is strong evidence suggesting an  
219 increase in corneal power with age mainly due to physiological  
220 changes in corneal biomechanics. [11]

221 In the current review, the Mean CA was 0.7 D which is lower than  
222 in other studies. [8,11] The difference could be attributed to the  
223 instrument used. This study used a manual technique while others  
224 [8] used an optical refractometer which has relatively more  
225 accuracy, precision, and repeatability in biometry measurements.  
226 The majority of participants had CA lesser than 0.5 D similar to  
227 reports elsewhere. [5] in disagreement, others found a large  
228 majority with CA greater than 1 D elsewhere. [18] The low  
229 magnitude of CA in our study could be due to ethnicity.  
230 Accordingly, Pontikos and colleagues reported that CA was larger  
231 among whites and light skin.[1]

232 According to gender, CA was strongly associated with females  
233 more than males similar to previous reports. [1,19] On the

234 contrary, elsewhere, [11,17,21] found no relationship between  
235 gender and CA. We cannot explain the findings of our study. With  
236 respect to gender, we found that age has no effect on CA similar to  
237 previous studies. [11,20] Nevertheless, others have reported that  
238 CA decreases according to age. [21] On the other hand, previous  
239 studies [3,22] found that CA decreases with age. Astigmatism is  
240 associated with younger age. [1] the wide disparity can be  
241 explained by the fact that genetics and environmental factors play a  
242 major role in corneal structural changes. [11]

243 Our study found that the majority of eyes had WTR astigmatism  
244 similar to the previous study. [23] However, other authors [5,11]  
245 found that a majority of eyes had ATR astigmatism. We attribute  
246 the variation to the age composition of the two studies. Apparently,  
247 we recruited a relatively younger group (mean age= 27 years)  
248 compared to Ferreira and colleagues. [8] (mean age=60 years).

249 Globally, It is generally accepted that WTR Astigmatism decreases  
250 while ATR increases with age due to anatomical changes in the  
251 eyelids and cornea. [11] Our study did not find a relationship  
252 between age and orientation of CA in contrast to other authors who  
253 suggest that ATR astigmatism increased with age while WTR  
254 astigmatism decreased with age, [8,11,13,23,24] Our review found  
255 no association between the orientation of CA and gender similar to  
256 studies elsewhere. [3] In contrast, others [11] reported that WTR is

257 associated with the female gender whereas, ATR is greater in male  
258 eyes. [12]

#### 259 Limitations

260 Our study is not without limitations. First, we employed a narrow  
261 age range which could mask the effect of age on the parameters. In  
262 addition, the current review did not take into account the posterior  
263 corneal surface measurements underestimating total corneal  
264 astigmatism. We propose a large-scale study probably at a national  
265 level to further investigate this phenomenon. Furthermore, our  
266 study results could be overestimated since they used manual  
267 measurements of k readings. Our study did not assess the  
268 correlation between refractive status and K readings.

#### 269 CONCLUSION

270 The study provides normal ocular biometric measurements with  
271 regard to K readings and anterior corneal astigmatism and the  
272 effects of age. The study found that Age and gender are not related  
273 to keratometry readings. CA was found to be associated with the  
274 female gender but not age. The majority have CA < 1.00D, which  
275 can be corrected by low-cost procedures like steep axis phaco,  
276 limbal relaxing incisions, and opposite clear corneal incisions,  
277 especially in developing countries like Malawi. In addition, less  
278 percentage of candidates would require expensive toric IOLs. The

279 Majority of eyes are WTR astigmatism. Our study suggests that  
280 ocular biometry should be considered as a pre-operative routine  
281 procedure to help improve visual outcomes and reduce the  
282 dependency on glasses for this underprivileged population.

283 Conflict of interest: None

284 Funding: None

285

286

287

288

289

290

291

292

293

294

295

296

297

298

## REFERENCE

- 299 1. Pontikos N, Chua S, Foster PJ, Tuft SJ, Day AC; UK  
300 Biobank Eye and Vision Consortium. Frequency and  
301 distribution of corneal astigmatism and keratometry  
302 features in adult life: Methodology and findings of the UK  
303 Biobank study. PLoS One. 2019 Sep 19;14(9):e0218144.  
304 doi: 10.1371/journal.pone.0218144. Erratum in: PLoS One.  
305 2020 Feb 27;15(2):e0229866. PMID: 31536508; PMCID:  
306 PMC6752876.
- 307 2. Hashemi H, Rezvan F, Yekta AA, Hashemi M, Norouzirad  
308 R, Khabazkhoob M. The prevalence of astigmatism and its  
309 determinants in a rural population of Iran: the "Nooravaran  
310 Salamat" mobile eye clinic experience. Middle East Afr J  
311 Ophthalmol. 2014 Apr-Jun;21(2):175-81. doi:  
312 10.4103/0974-9233.129772. PMID: 24791111; PMCID:  
313 PMC4005184.
- 314 3. Nemeth G, Hassan Z, Szalai E, Berta A, Modis L Jr.  
315 Analysis of age-dependence of the anterior and posterior  
316 cornea with scheimpflug imaging. J Refract Surg. 2013  
317 May;29(5):326-31. doi: 10.3928/1081597X-20130301-01.  
318 Epub 2013 Mar 8. PMID: 23459157.
- 319 4. Ferreira TB, Hoffer KJ, Ribeiro F, Ribeiro P, O'Neill JG.  
320 Ocular biometric measurements in cataract surgery



- 321 candidates in Portugal. PLoS One. 2017 Oct  
322 5;12(10):e0184837. doi: 10.1371/journal.pone.0184837.  
323 PMID: 28982150; PMCID: PMC5629012.
- 324 5. Yu JG, Zhong J, Mei ZM, Zhao F, Tao N, Xiang Y.  
325 Evaluation of biometry and corneal astigmatism in cataract  
326 surgery patients from Central China. BMC Ophthalmol.  
327 2017 Apr 26;17(1):56. doi: 10.1186/s12886-017-0450-2.  
328 PMID: 28446167; PMCID: PMC5405481.
- 329 6. Gohari M, Noorizaher F, Salimpur S, Aghayi M, Besharati  
330 MR. Prevalence of Corneal Astigmatism before Cataract  
331 Surgery in Yazd Province, Iran. J Ophthalmol Opto Sci .  
332 [Internet]. 2016Sep.24 [cited 2022Jul.26];1(1):14-8.  
333 Available from:  
334 <https://journals.sbmu.ac.ir/basir/article/view/14313>
- 335 7. Mohammadi M, Naderan M, Pahlevani R, Jahanrad A.  
336 Prevalence of corneal astigmatism before cataract surgery.  
337 Int Ophthalmol. 2016 Dec;36(6):807-817. doi:  
338 10.1007/s10792-016-0201-z. Epub 2016 Feb 24. PMID:  
339 26909501.
- 340 8. Ferreira TB, Ribeiro P, Ribeiro FJ, O'Neill JG. Comparison  
341 of Methodologies Using Estimated or Measured Values of  
342 Total Corneal Astigmatism for Toric Intraocular Lens  
343 Power Calculation. J Refract Surg. 2017 Dec 1;33(12):794-

- 344 800. doi: 10.3928/1081597X-20171004-03. PMID:  
345 29227506.
- 346 9. Yamane, T. (1967) Statistics: An Introductory  
347 Analysis. 2nd Edition, Harper and Row, New York
- 348 10. Cordero I. Verifying the calibration of a manual one-  
349 position keratometer. Community Eye Health.  
350 2013;26(84):77. PMID: 24782588; PMCID: PMC3936693.
- 351 11. Hashemi H, Yekta A, Shokrollahzadeh F, Aghamirsalim  
352 M, Ostadimoghaddam H, Hashemi A, Heydarian S,  
353 Khabazkhoob M. The Distribution of Keratometry in a  
354 Population Based Study. J Curr Ophthalmol. 2021 Mar  
355 26;33(1):17-22. doi: 10.1016/j.joco.2019.06.004. PMID:  
356 34084952; PMCID: PMC8102948.
- 357 12. Hayashi K, Sato T, Sasaki H, Hirata A, Yoshimura K. Sex-  
358 related differences in corneal astigmatism and shape with  
359 age. J Cataract Refract Surg. 2018 Sep;44(9):1130-1139.  
360 doi: 10.1016/j.jcrs.2018.06.020. Epub 2018 Aug 1. PMID:  
361 30077353.
- 362 13. Thom L, Jogessar S, McGowan SL, Lawless F. The  
363 prevalence and causes of decreased visual acuity - a study  
364 based on vision screening conducted at Enukwani and  
365 Mzuzu Foundation Primary Schools, Malawi. Clin Optom  
366 (Auckl). 2016 Dec 19;9:1-10. doi:

- 367 10.2147/OPTO.S110097. PMID: 30214354; PMCID:  
368 PMC6095573.
- 369 14. Agrawal, J., Kumar, P., & Jain, P. (2018). Anthropometric  
370 Measurement Of Corneal Curvature By Keratometry In  
371 Adult Central Indian Population. *Int J Anat Res*, 6(2.3),  
372 5346-50.
- 373 15. Orucoglu F, Akman M, Onal S. Analysis of age, refractive  
374 error and gender related changes of the cornea and the  
375 anterior segment of the eye with Scheimpflug imaging.  
376 *Cont Lens Anterior Eye*. 2015 Oct;38(5):345-50. doi:  
377 10.1016/j.clae.2015.03.009. Epub 2015 Apr 21. PMID:  
378 25910463.
- 379 16. De Bernardo M, Zeppa L, Zeppa L, Cornetta P, Vitiello L,  
380 Rosa N. Biometric Parameters and Corneal Astigmatism:  
381 Differences Between Male and Female Eyes. *Clin*  
382 *Ophthalmol*. 2020 Feb 28;14:571-580. doi:  
383 10.2147/OPHTH.S219912. PMID: 32184545; PMCID:  
384 PMC7053823.
- 385 17. Kim JH, Kim M, Lee SJ, Han SB, Kong YT, Yang HK,  
386 Hyon JY. Age-related differences in ocular biometry in  
387 adult Korean population. *BMC Ophthalmol*. 2016 Aug  
388 22;16(1):146. doi: 10.1186/s12886-016-0328-8. PMID:  
389 27549766; PMCID: PMC4994275

- 390 18. Hoffmann PC, Hütz WW. Analysis of biometry and  
391 prevalence data for corneal astigmatism in 23,239 eyes. J  
392 Cataract Refract Surg. 2010 Sep;36(9):1479-85. doi:  
393 10.1016/j.jcrs.2010.02.025. PMID: 20692558.
- 394 19. Sanfilippo PG, Yazar S, Kearns L, Sherwin JC, Hewitt  
395 AW, Mackey DA. Distribution of astigmatism as a function  
396 of age in an Australian population. Acta Ophthalmol. 2015  
397 Aug;93(5):e377-85. doi: 10.1111/aos.12644. Epub 2015  
398 Jan 13. PMID: 25585855.
- 399 20. Huang Q, Huang Y, Luo Q, Fan W. Ocular biometric  
400 characteristics of cataract patients in western China. BMC  
401 Ophthalmol. 2018 Apr 17;18(1):99. doi: 10.1186/s12886-  
402 018-0770-x. PMID: 29665792; PMCID: PMC5904982.
- 403 21. Wu Z, Liu C, Chen Z. Prevalence and Age-Related  
404 Changes of Corneal Astigmatism in Patients Undergoing  
405 Cataract Surgery in Northern China. J Ophthalmol. 2020  
406 Sep 29;2020:6385098. doi: 10.1155/2020/6385098. PMID:  
407 33062314; PMCID: PMC7542495.
- 408 22. Ma R, Liu Y, Zhang L, Ma J, Cui T, Lei Y, Hou J, Shen Z,  
409 Yi X, Liang G, Wang Y. Changes in Corneal Morphology  
410 with Age in Asian Population: A Multicenter Study of  
411 30,618 Cases. Adv Ther. 2021 Dec;38(12):5763-5776. doi:

- 412 10.1007/s12325-021-01922-4. Epub 2021 Oct 10. PMID:  
413 34704192; PMCID: PMC8572190.
- 414 23. Chaudhary M., Dahal HN, Prevalence and types of corneal  
415 astigmatism in patients undergoing cataract surgery.  
416 Journal of Institute of Medicine. 2017 Apr 1;39(1). 22.  
417 Joshi Rajesh Subhash, Jadhav, Sonali
- 418 24. Kim H, An Y, Joo CK. Gender-differences in age-related  
419 changes of corneal astigmatism in Korean cataract patients.  
420 BMC Ophthalmol. 2019 Jan 24;19(1):31. doi:  
421 10.1186/s12886-018-1001-1. PMID: 30678644; PMCID:  
422 PMC6346567.

423

424

425

426 FIGURES

427

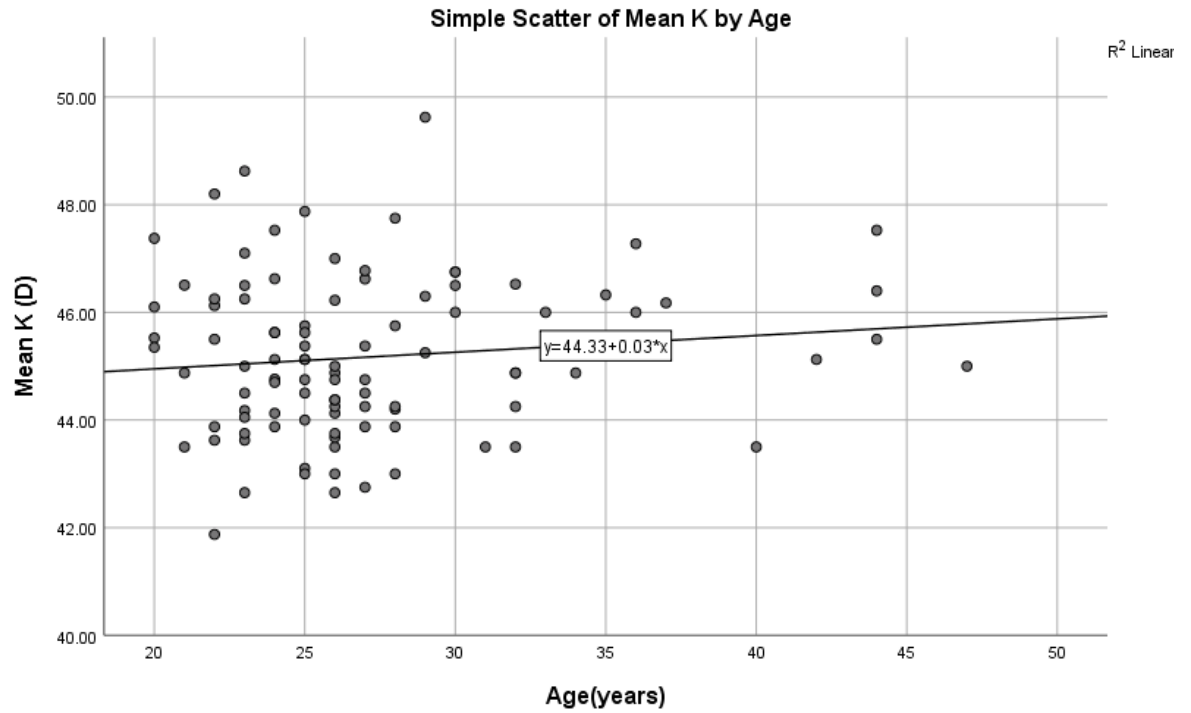

428  
429

430 **Figure 1. Relationship between mean K and age**

431

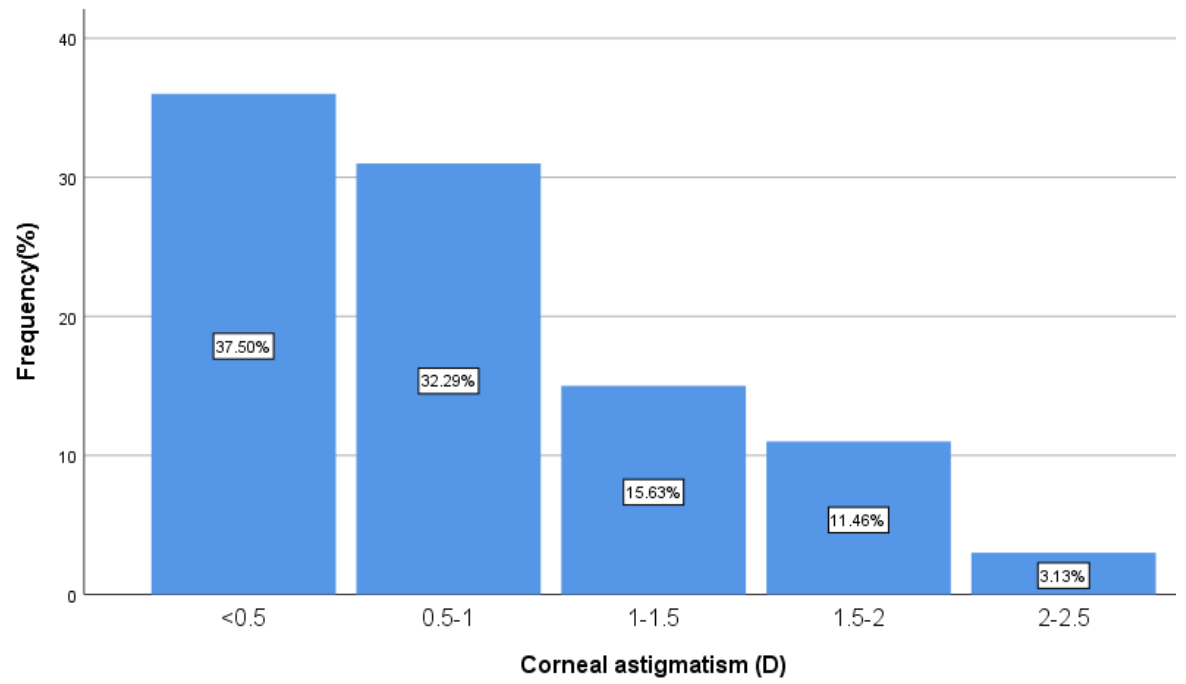

432

433

434 **Figure 2. The distribution of corneal astigmatism in 0.50D**

435 **steps**

436

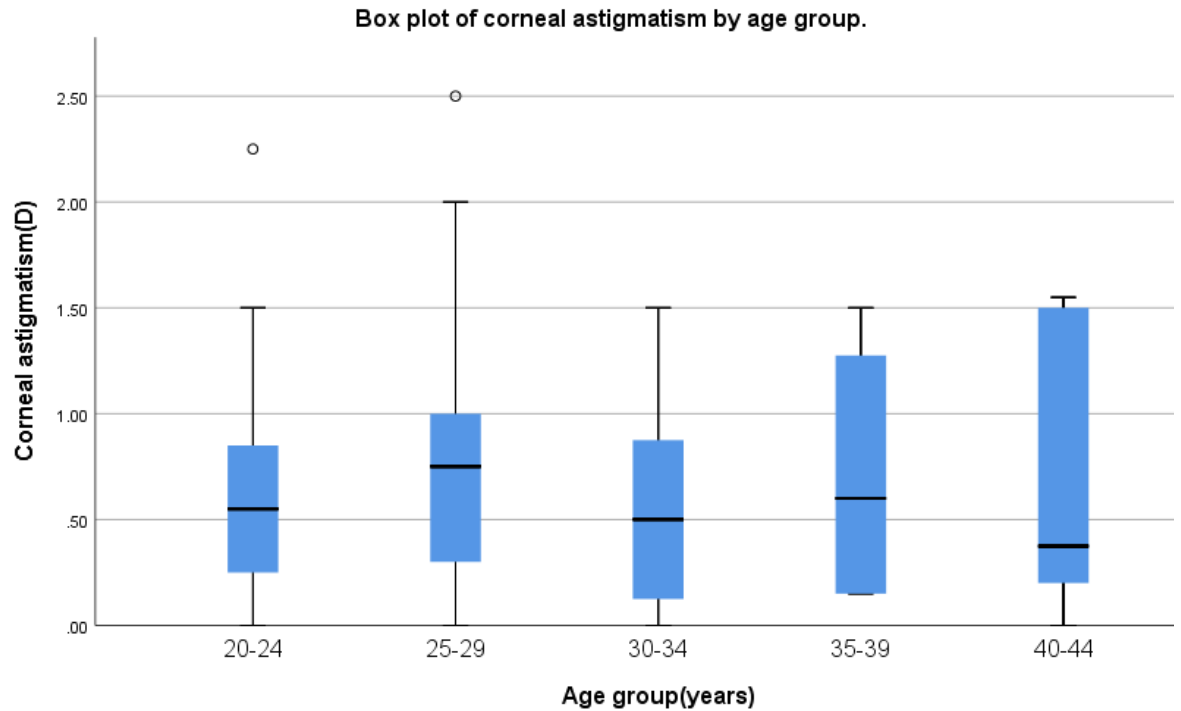

437

438 **Figure 3: Box plot of corneal astigmatism values (D) in all six**  
439 **age groups; Boxes show the interquartile range. Bold lines in**  
440 **the boxes represent the median (Q2 or 50 % percentile), the**  
441 **upper and lower limits of the box represent the first quartile**  
442 **(Q1 or 25 % percentile) and the third quartile (Q3 or 75 %**  
443 **percentile), and the bars represent the extreme values**  
444 **(maximum and minimum observations). circles represent**  
445 **outliers**

446



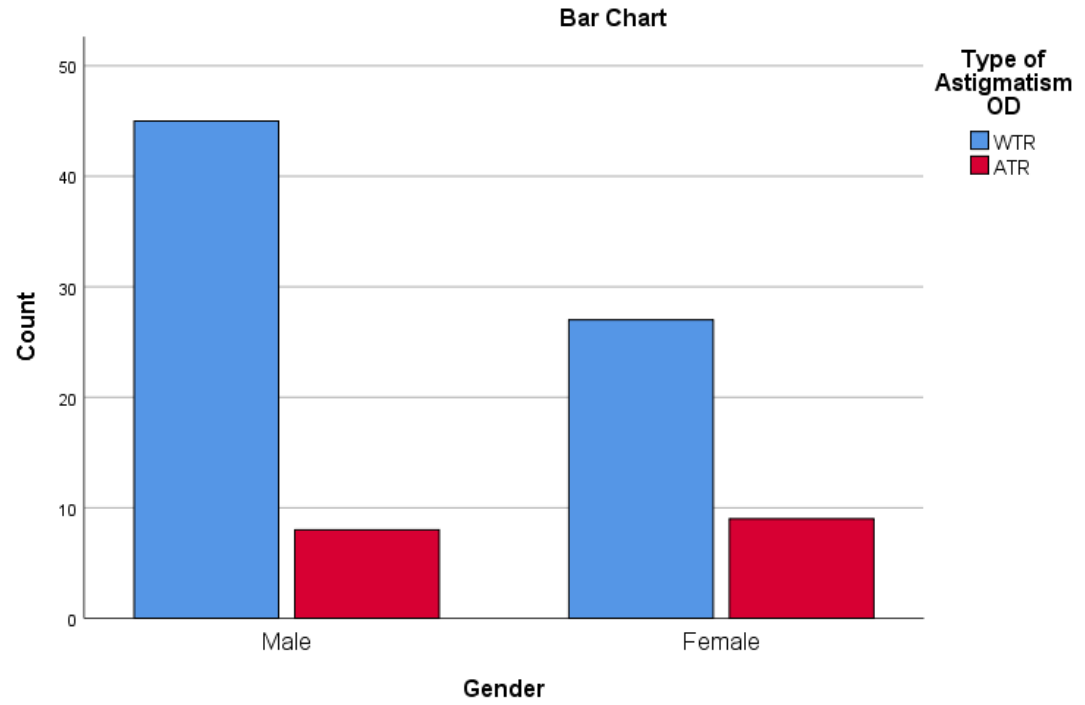

447

448 **Figure 4. Distribution of WTR and ATR CA between males**

449 **and females**

450

451

452

453

454

455

456

457

458
